# Supplementary material
Source: MDPI journal article supplement (https://www.mdpi.com/2813-2998/2/4/41)
Supplement: s1 [file s1]

Archive with 1 entries (1 files):
- ddc-2624432-supplementary.pdf
